# Supplementary material for: The impact of inotersen on Neuropathy Impairment Score in patients with hereditary transthyretin amyloidosis with polyneuropathy
Source: PubMed Central journal article supplement (PMC10022100; doi:10.1186/s12883-023-03116-7), 2023-03-17

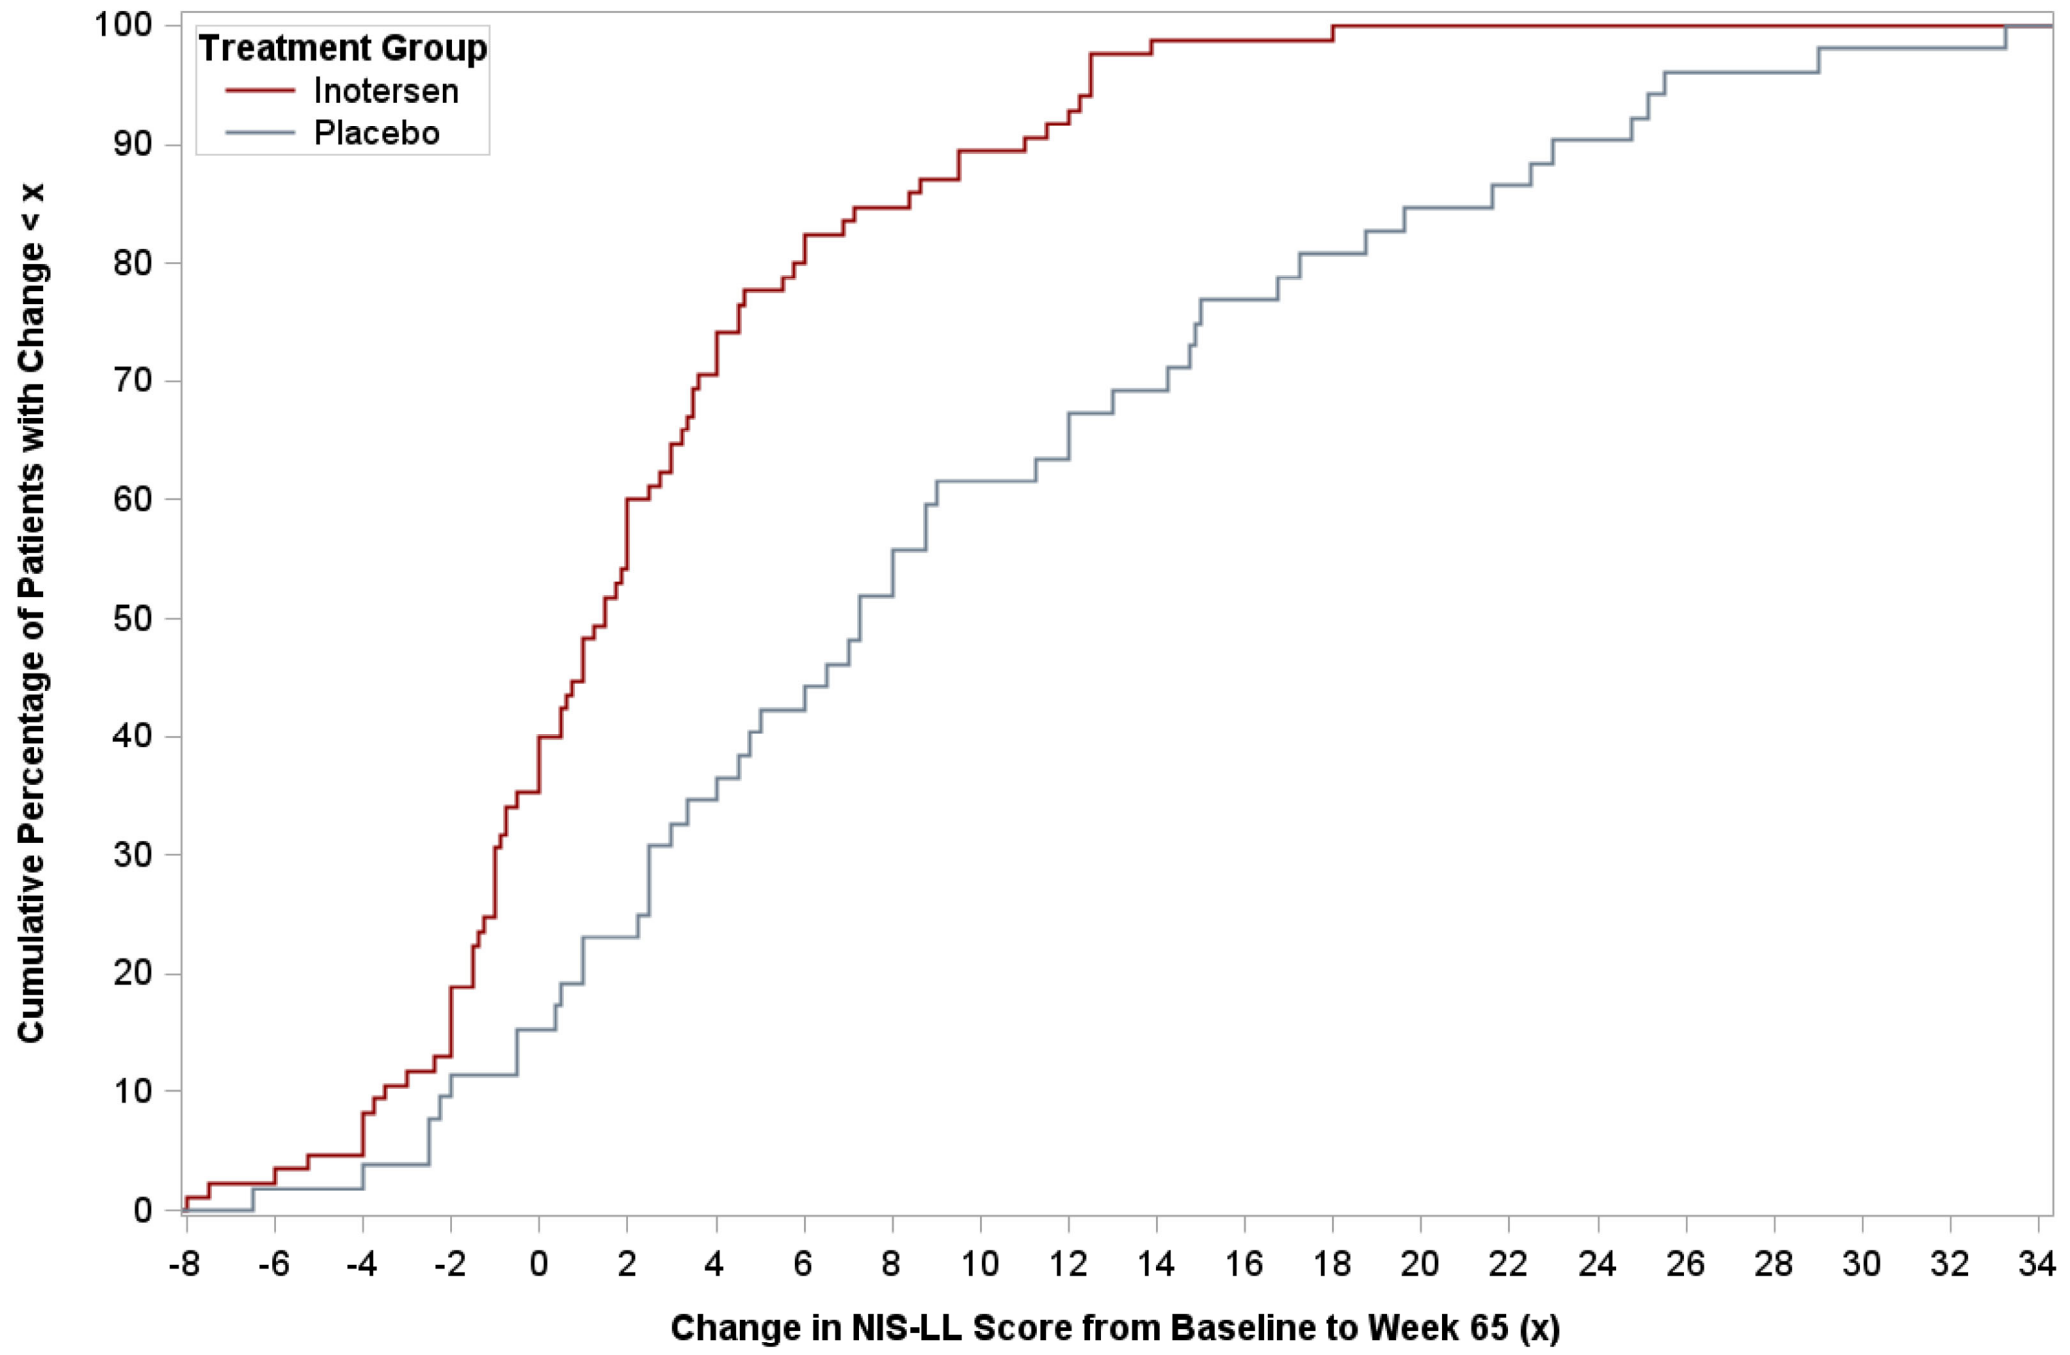

Supplement: 12883_2023_3116_MOESM3_ESM.pdf [file 12883_2023_3116_MOESM3_ESM.pdf]
